# Supplementary material for: Protective effects of enhanced minor ginsenosides in Lactobacillus fermentum KP-3-fermented ginseng in mice fed a high fat diet
Source: Royal Society of Chemistry journal article supplement (doi:10.1039/c8fo01056k), 2018-01-01
Supplement: c8fo01056k1.pdf [file c8fo01056k1.pdf]

**Protective effects of enhanced minor ginsenosides in *Lactobacillus fermentum* KP-3-fermented ginseng for mice fed a high fat diet**

Bo Nan<sup>a,d</sup>, Yan-long Liu<sup>c</sup>, Ying You<sup>a</sup>, Wan-cong Li<sup>a</sup>, Jing-jing Fan<sup>a</sup>, Yu-shan Wang<sup>a</sup>,

Chun-hong Piao<sup>a,b</sup>, Dong-liang Hu<sup>e</sup>, Gui-jiao Lu<sup>f</sup>, Yu-hua Wang<sup>a,b\*</sup>

<sup>a</sup> College of Food science and Engineering, Jilin Agricultural University, Changchun, China.

<sup>b</sup> National Processing Laboratory for Soybean Industry and technology, Changchun, China.

<sup>c</sup> College of Pharmaceutical Sciences, Wenzhou Medical University, Wenzhou, China

<sup>d</sup> College of Food science and Engineering, Jilin University, Changchun, China.

<sup>e</sup> School of Veterinary Medicine, Kitasato University, Aomori-Ken, Japan.

<sup>f</sup> Jilin Correction Health Co., Ltd, Changchun, China.

\* Corresponding author. Tel: +86 0431 84515118; fax: +86 0431 84515118.

E-mail address: yuhua-ww@163.com (Yu-hua Wang)

**Figure S1:**

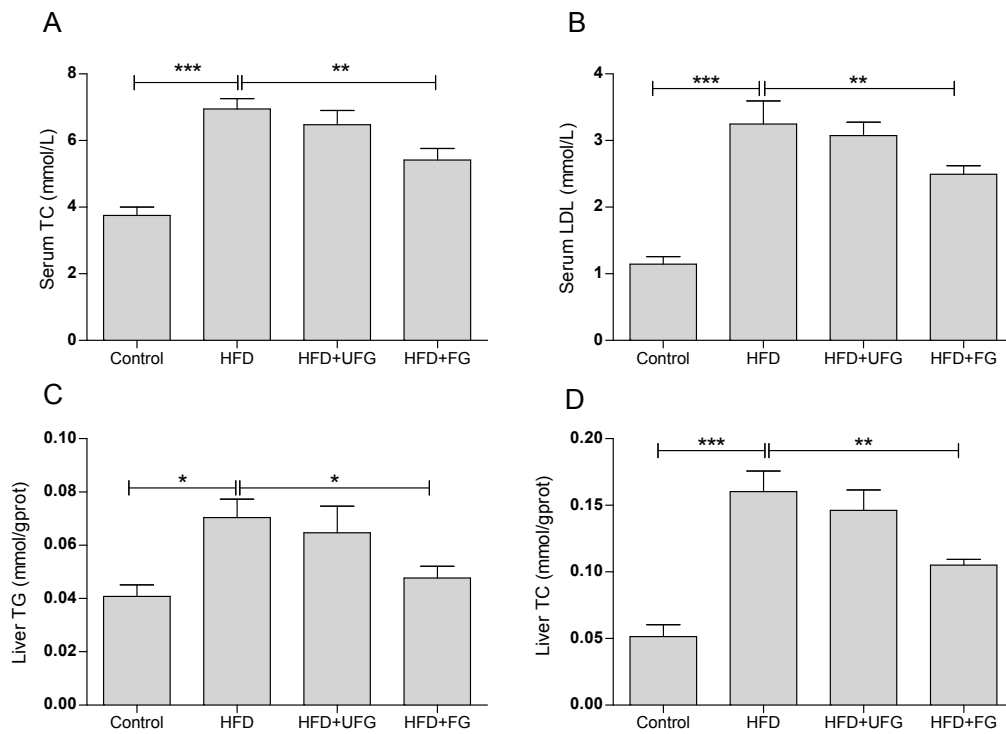

**Fig. S1** The effects of different ginseng on lipid profiles. Serum TC (A), Serum LDL (B), Liver TG (C), and Liver TC (D) levels of mice in different groups at the end of the experiment. Control, normal chow; HFD, high fat diet; HFD + UFG, high fat diet supplemented with the un-fermented ginseng; HFD + FG, high fat diet supplemented with the probiotic-fermented ginseng. Values are presented as mean  $\pm$  SEM (n = 10). \* (P < 0.05), \*\* (P < 0.01) and \*\*\* (P < 0.001) indicate significant differences between different groups.

**Figure S2**

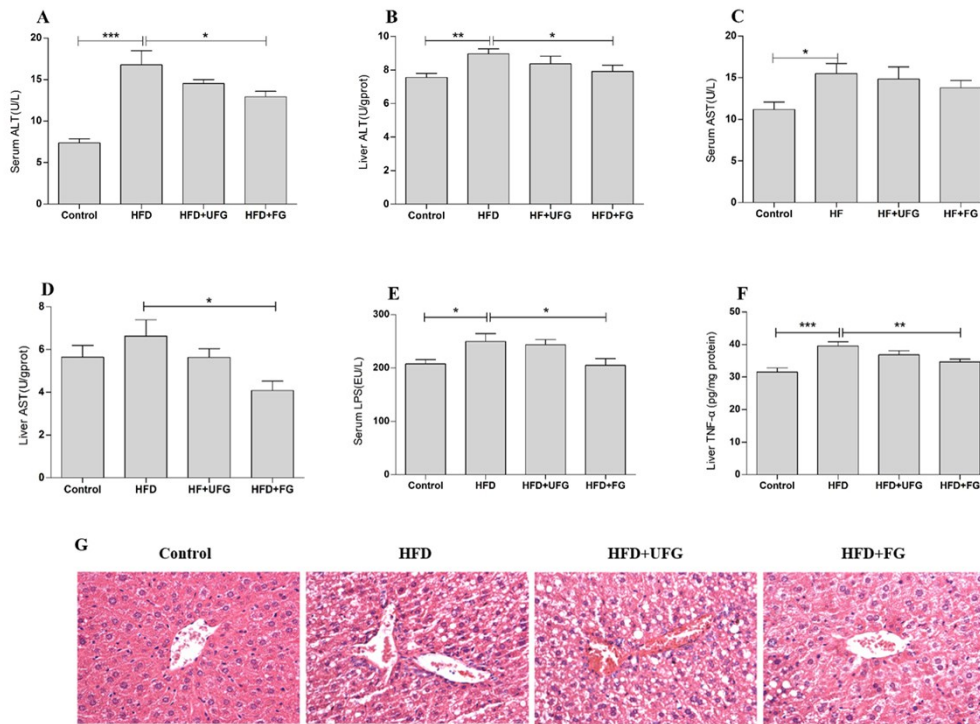

**Fig. S2** The effects of different ginseng on HFD-induced liver injury. Serum ALT (A), Liver ALT (B), Serum AST (C), Liver AST (D), Serum LPS (E) and Liver TNF- $\alpha$  (F) levels of mice in different groups at the end of the experiment. The histological changes of liver sections were measured by HE staining at 100  $\times$  magnification (G). Control, normal chow; HFD, high fat diet; HFD + UFG, high fat diet supplemented with the un-fermented ginseng; HFD + FG, high fat diet supplemented with the probiotic-fermented ginseng. Values are presented as mean  $\pm$  SEM (n = 10). \* ( $P < 0.05$ ), \*\* ( $P < 0.01$ ) and \*\*\* ( $P < 0.001$ ) indicate significant differences between different groups.
